# Supplementary material
Source: PubMed Central journal article supplement (PMC3605999)
Supplement: supp_P031260_jlr.P031260-1.pdf [file supp_P031260_jlr.P031260-1.pdf]

Online Supplementary Material

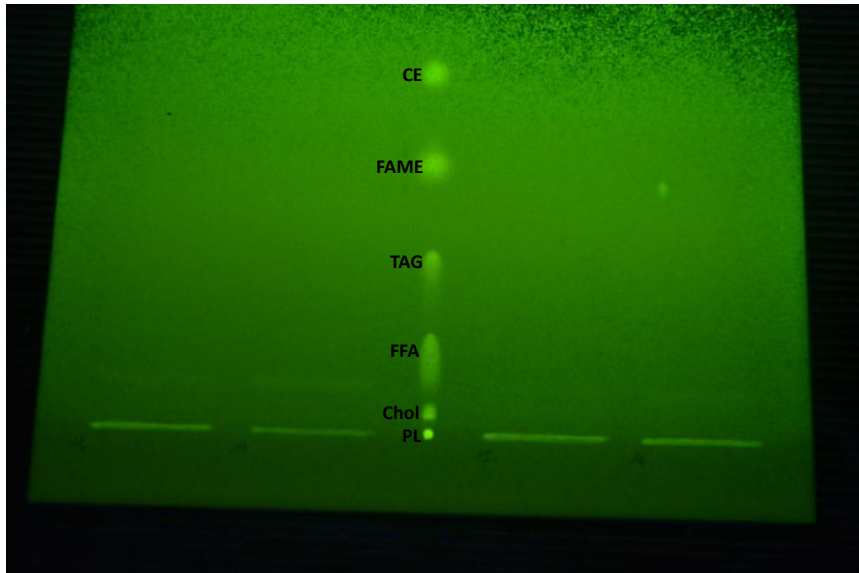

**Suppl. Fig. 1: Phospholipids form the major part of cellular lipid extracts of PBMC.**

Lipid extracts of cells incubated with 100  $\mu$ M EPA (both bands left) or 100  $\mu$ M DHA (both bands right) for 24 h were fractionated by thin layer chromatography. Components of the standard: PL – phospholipids, Chol – cholesterol, FFA – free fatty acids, TAG – triacylglycerol, FAME – fatty acid methyl esters, CE – cholesterol esters.
