# Supplementary material
Source: PubMed Central journal article supplement (PMC3605999)
Supplement: supp_P031260_jlr.P031260-2.pdf [file supp_P031260_jlr.P031260-2.pdf]

Online Supplementary Material

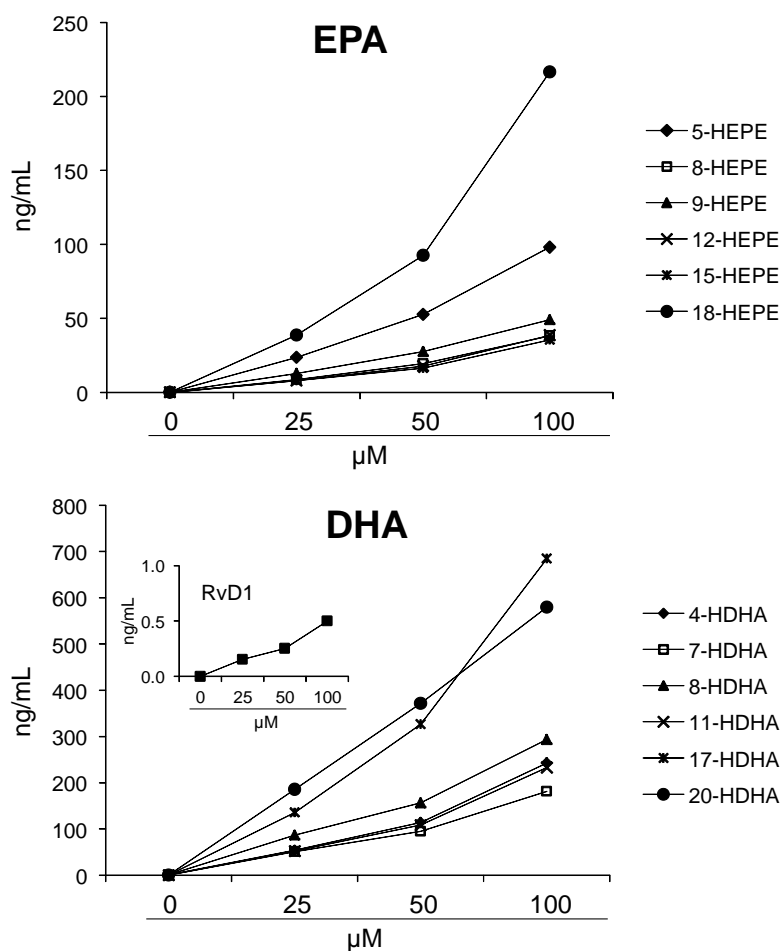

**Suppl. Fig. 2: Non-enzymatic oxidation of EPA and DHA.** Monohydroxy derivatives were measured by high performance liquid chromatography-tandem mass spectrometry after 24 h incubation with increasing concentrations of EPA or DHA in the absence of cells.
